# Supplementary material for: Self-assembled nanocomposite of HKUST-1 and LAPONITE®: towards a hydrogel with high mechanical strength for selective dye adsorption and column chromatographic separation
Source: Royal Society of Chemistry journal article supplement (doi:10.1039/d5dt02005k), 2025-12-15
Supplement: d5dt02005k1.pdf [file d5dt02005k1.pdf]

## Supporting Information

### **Self-Assembled Nanocomposite of HKUST-1 and Laponite: Towards Hydrogel with High Mechanical Strength for Selective Dye Adsorption and Column Chromatographic Separation**

Jyoti,<sup>a</sup> Chhaya,<sup>a</sup> Vinod Kumar<sup>a</sup> and Anindita Chakraborty<sup>\*b</sup>

<sup>a</sup>*Department of Chemistry, School of Basic Sciences, Central University of Haryana,  
Mahendergarh 123031, Haryana, India*

<sup>b</sup>*Special Centre for Nano Sciences, Jawaharlal Nehru University, New Mehrauli Road, New  
Delhi, Delhi 110067, India*

*E-mail: anindita.chemistry1@gmail.com*

### **Table of Contents**

|                                                                                       |              |
|---------------------------------------------------------------------------------------|--------------|
| <b>PXRD patterns of as-synthesized HKUST-1 and simulated HKUST-1 .....</b>            | <b>2</b>     |
| <b>Optimization of hydrogel nanocomposite .....</b>                                   | <b>2</b>     |
| <b>Optimization table of reaction conditions for gel formation .....</b>              | <b>3</b>     |
| <b>Inverted image displays the formation of stable HKUST-1@LP hydrogel .....</b>      | <b>3</b>     |
| <b>PXRD patterns.....</b>                                                             | <b>4-5</b>   |
| <b>TGA plots of as-synthesized HKUST-1, LP and HKUST-1@LP xerogel.....</b>            | <b>5</b>     |
| <b>FESEM images, particle size distribution histogram and elemental mapping .....</b> | <b>6-7</b>   |
| <b>Structure and size of dyes .....</b>                                               | <b>7</b>     |
| <b>UV-vis plots of dye adsorption .....</b>                                           | <b>8-9</b>   |
| <b>Comparative dye adsorption data of HKUST-1-based MOFs/MOF composites .....</b>     | <b>10</b>    |
| <b>Gel-column chromatographic dye separation .....</b>                                | <b>11</b>    |
| <b>AFM Images of HKUST-1@LP hydrogel thin film .....</b>                              | <b>11</b>    |
| <b>Adsorption Kinetics.....</b>                                                       | <b>12-13</b> |

## PXRD patterns of as-synthesized HKUST-1 and simulated HKUST-1

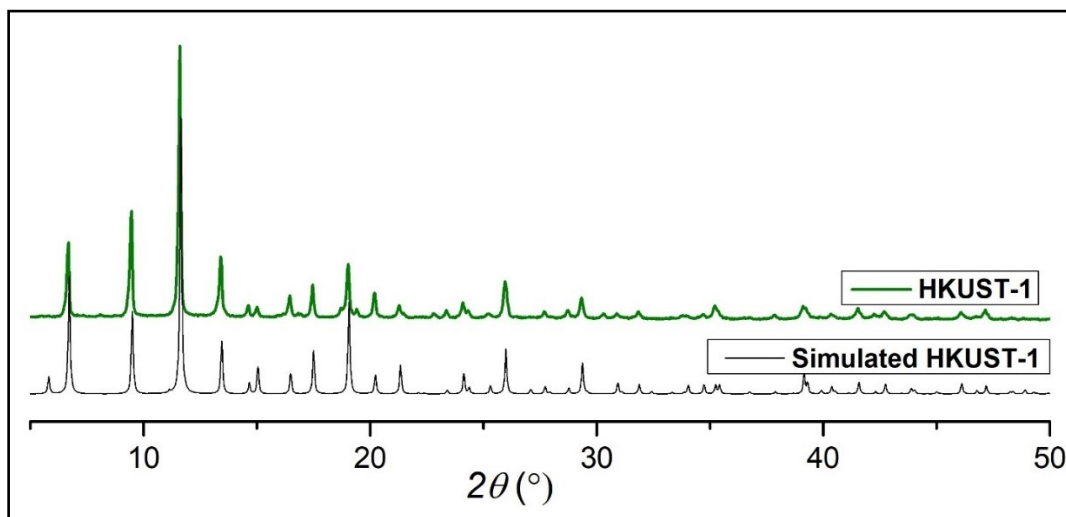

**Fig. S1** PXRD patterns of as-synthesized HKUST-1 and Simulated HKUST-1.

## Optimization of hydrogel nanocomposite

To synthesize the hydrogel nanocomposite, we initially focused on optimizing the reaction conditions for the composite formation. We prepared several batches under varied reaction conditions to identify the optimal parameters. The hydrogel nanocomposite formulation involved an *ex-situ* synthetic process, starting with preparing a stock solution of HKUST-1 i.e., 20 mg of HKUST-1 was dispersed in 4 ml of methanol by sonication for about 45 minutes at 35 °C. Simultaneously, different amount of LP (10, 15 & 16 mg) was dispersed in 1 ml water. Following this, the HKUST-1 suspension (ranges from 400-900  $\mu$ l) was added to the LP solution under sonication at 35 °C. Entry no. 2 (**Table S1**) was selected for further studies, which yielded instant gel termed as **HKUST-1@LP (Fig. S2)**.

## Optimization table of reaction conditions for gel formation

**Table S1.** Optimisation of reaction conditions for gel formation

| Entry | Amount of HKUST-1 suspension in methanol ( $\mu$ l) | Amount of laponite in 1 ml H <sub>2</sub> O |               |                              |
|-------|-----------------------------------------------------|---------------------------------------------|---------------|------------------------------|
|       |                                                     | 10 mg                                       | 15 mg         | 16 mg                        |
| 1     | 400                                                 | Viscous fluid                               | Viscous fluid | Viscous fluid                |
| 2     | <b>500</b>                                          | Viscous fluid                               | Viscous fluid | <b>Instant Gel formation</b> |
| 3     | 600                                                 | Viscous fluid                               | Viscous fluid | Viscous fluid                |
| 4     | 700                                                 | Viscous fluid                               | Viscous fluid | Viscous fluid                |
| 5     | 800                                                 | Viscous fluid                               | Viscous fluid | Viscous fluid                |
| 6     | 900                                                 | Viscous fluid                               | Viscous fluid | Viscous fluid                |

**Inverted image displays the formation of stable HKUST-1@LP hydrogel**

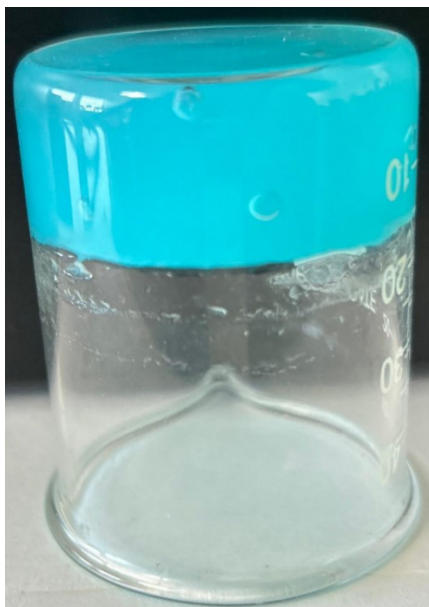

**Fig. S2** Inverted image displays the formation of stable **HKUST-1@LP** hydrogel.

## PXRD patterns

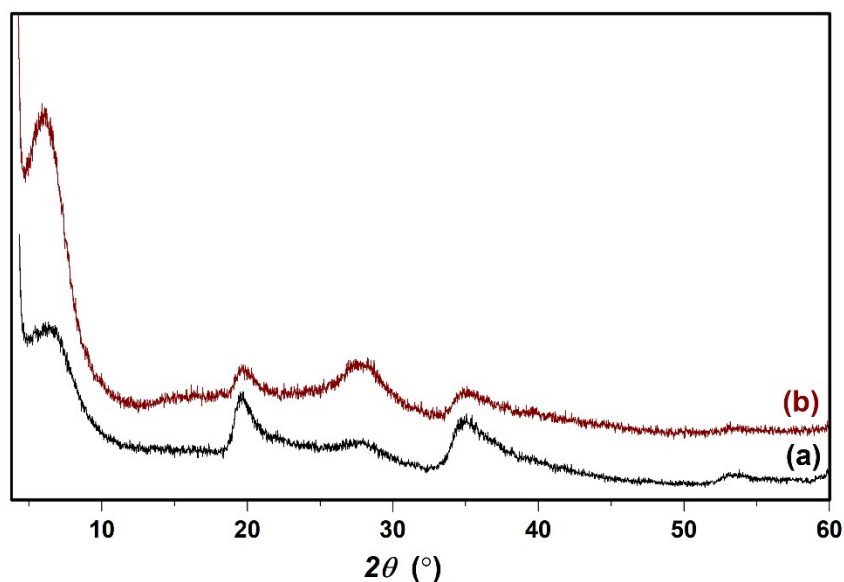

**Fig. S3a** PXRD patterns of (a) LP and (b) HKUST-1@LP xerogel.

## Chemical stability of HKUST-1 phase in the composite

To understand the chemical stability of HKUST-1 phase in the composite, we have carried out additional experiments. Specifically, 20 mg of HKUST-1 was dispersed in 4 ml of methanol by sonication for about 45 minutes at 35 °C. This stock solution of HKUST-1 (20 mg in 4 ml MeOH) was immersed in 8 ml of water and sonicated. The resulting mixture was allowed to stand for 2 minutes, and an identical batch was prepared and left to stand for 1 hour. Afterward, the samples were centrifuged, and the MOF solids were collected and dried. The dried materials were analyzed by PXRD. The obtained pattern (**Fig. S3b**) clearly shows that the characteristic diffraction peaks of HKUST-1 are retained, confirming that the HKUST-1 framework does not undergo decomposition under the applied conditions. These results verify the chemical integrity and structural stability of HKUST-1 within the composite.

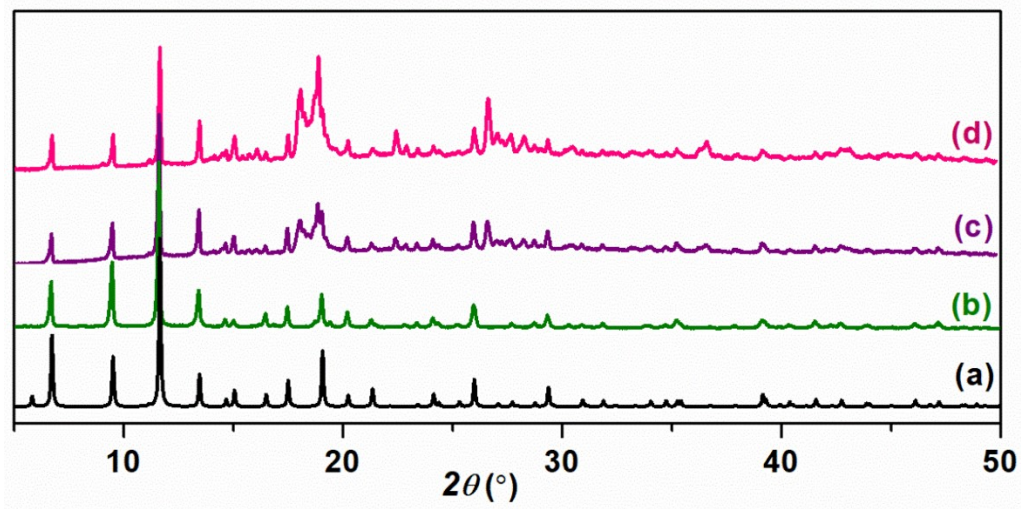

**Fig. S3b** PXRD patterns of (a) Simulated HKUST-1, (b) as-synthesized HKUST-1, (c) and (d) HKUST-1 sample immersed in water under conditions identical to the synthesis for 2 min and 1 hour, respectively.

#### TGA plots of as-synthesized HKUST-1, LP and HKUST-1@LP xerogel

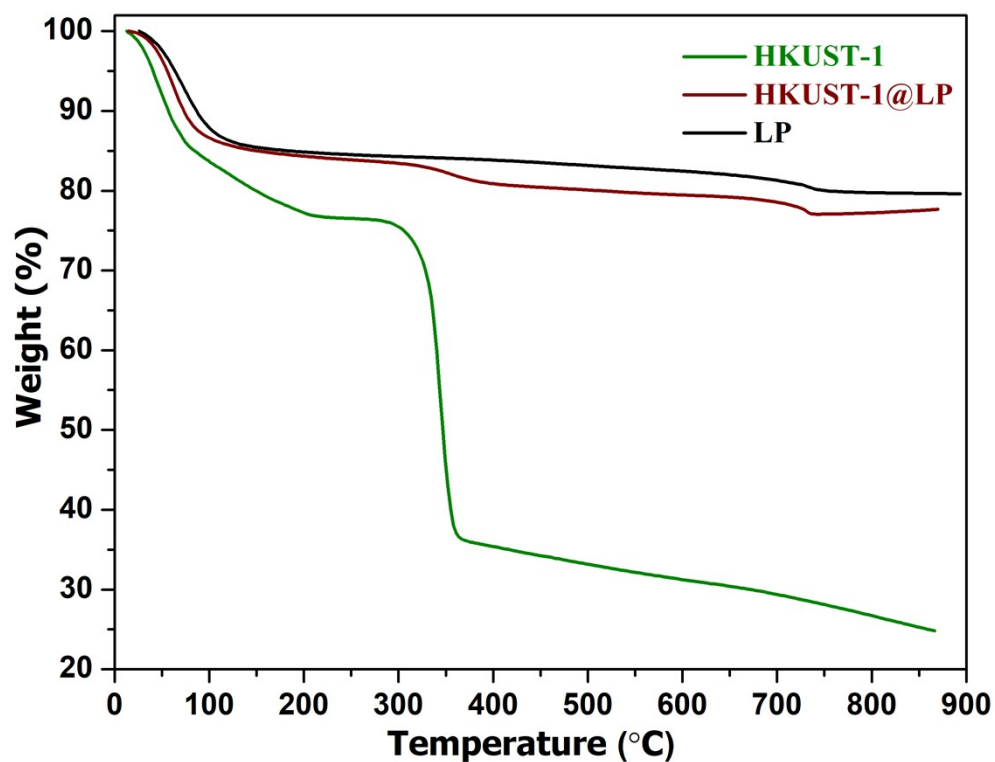

**Fig. S4** TGA plots of as-synthesized HKUST-1, LP and **HKUST-1@LP** xerogel.

## FESEM images, particle size distribution histogram and elemental mapping

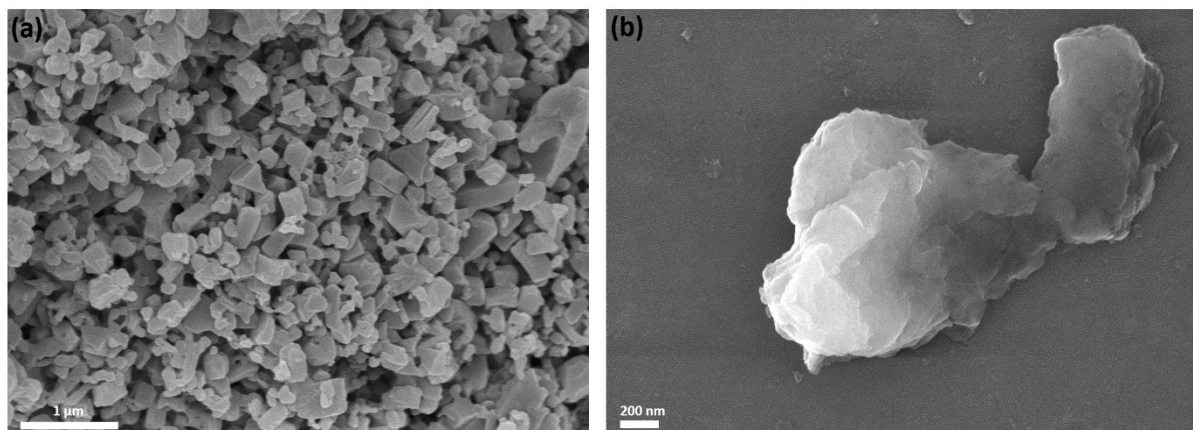

**Fig. S5** FESEM images of (a) as-synthesized HKUST-1 and (b) **HKUST-1@LP** xerogel.

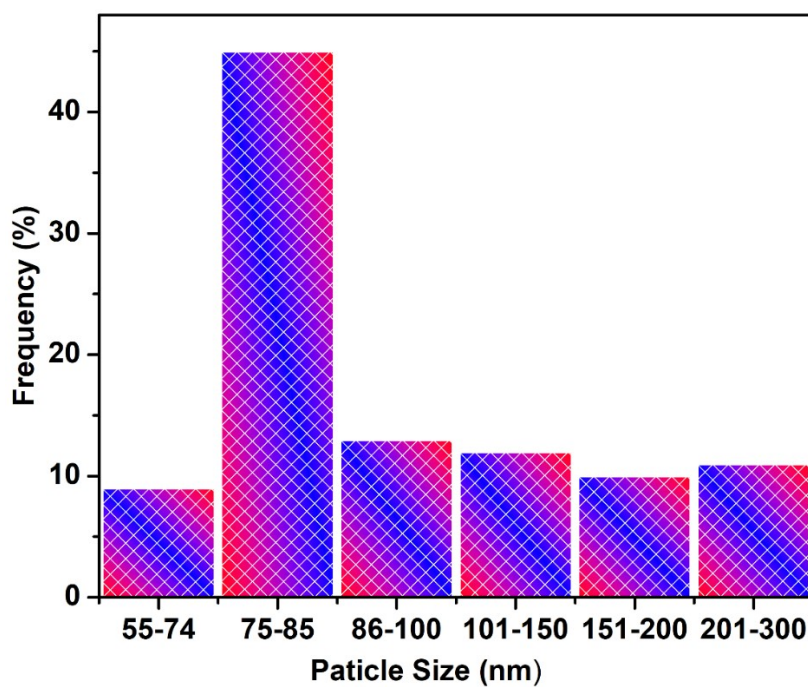

**Fig. S6** The particle size distribution histogram plot of as-synthesized HKUST-1.



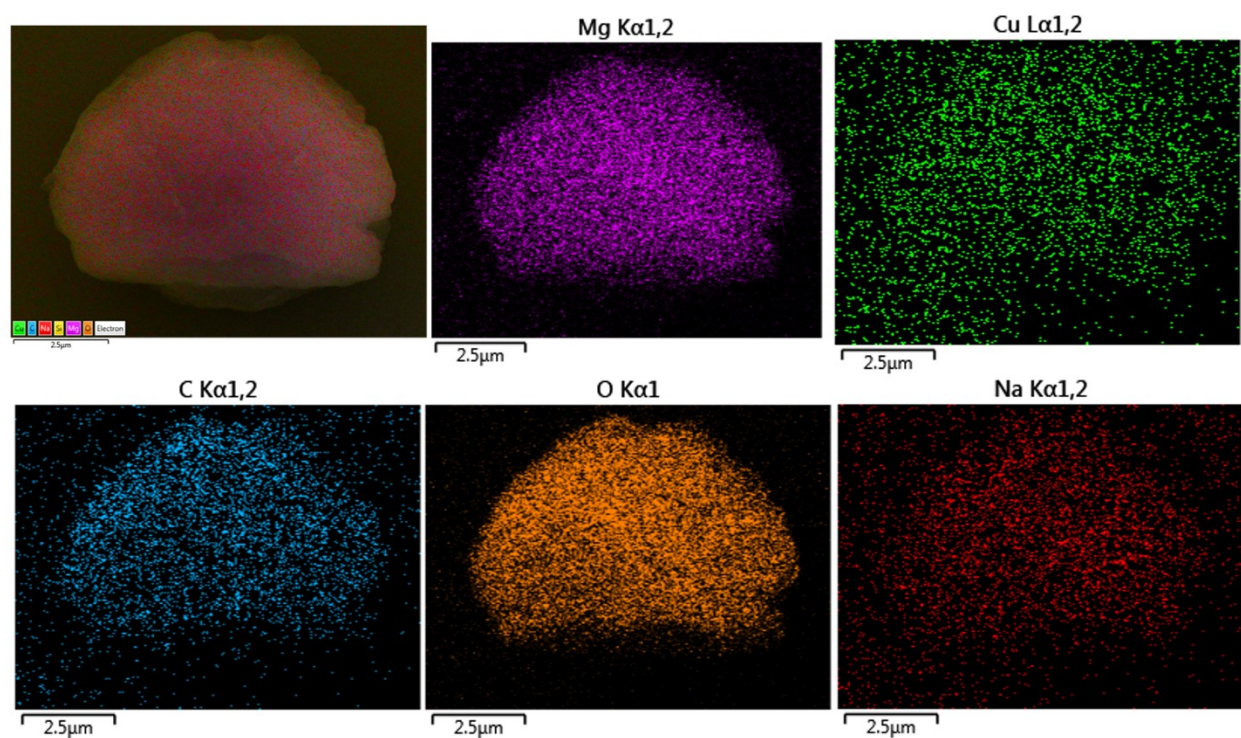

**Fig. S7** Elemental mapping of **HKUST-1@LP** xerogel showing uniform distribution of the elements (Cu from as-synthesized HKUST-1 and Mg, Na from LP) throughout the sample.

## Structure and size of dyes

**Table S2:** Chemical structure, maximum wavelengths and size of dye used.

| Dyes                         | Molecular Structure | Size               |
|------------------------------|---------------------|--------------------|
| Methyl Orange<br>(Anionic)   |                     | 2.6X6.5X15.8 Å     |
| Methylene Blue<br>(Cationic) |                     | 4.59X8.01X16.7 Å   |
| Rhodamine B<br>(Cationic)    |                     | 6.79X11.80X15.78 Å |

## UV-vis plots of dye adsorption

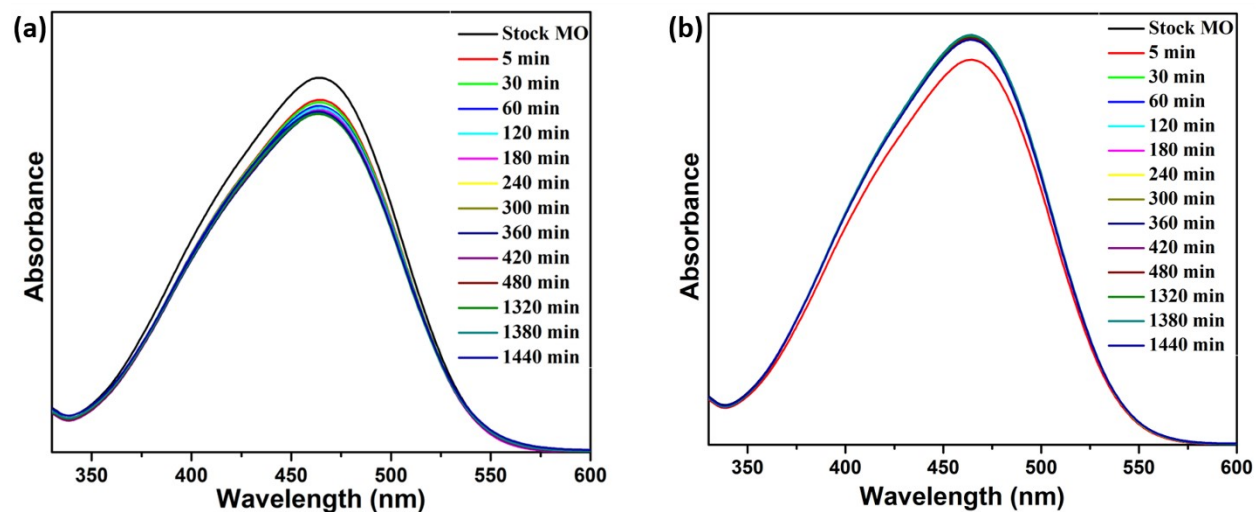

**Fig. S8** UV-vis plots of adsorption of MO dye (a) using **HKUST-1@LP** xerogel and (b) using LP.

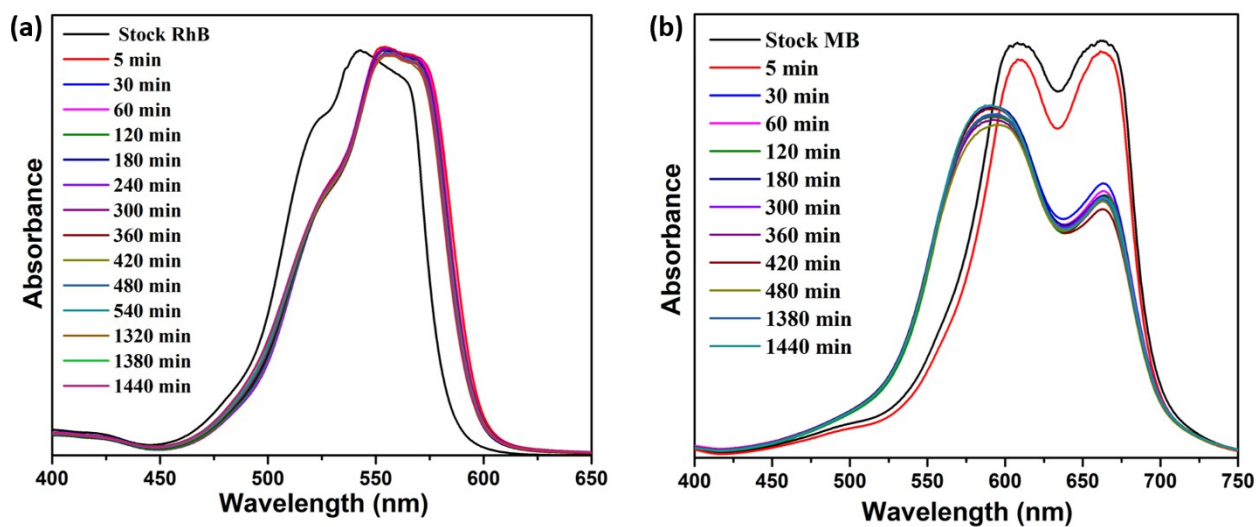

**Fig. S9** UV-vis plots of dye adsorption using LP with (a) RhB and (b) MB dyes.



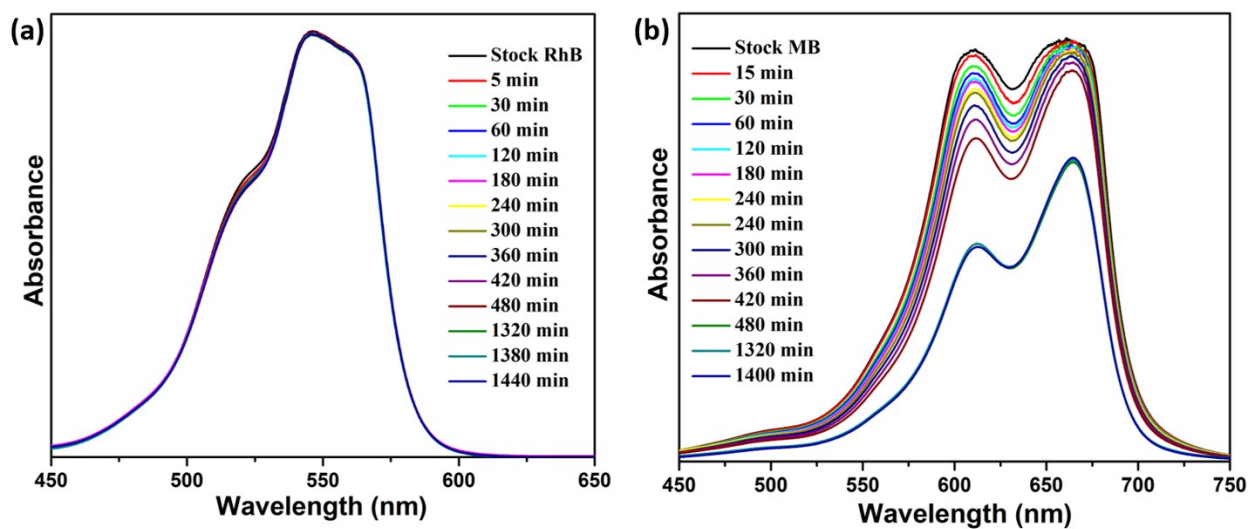

**Fig. S10** UV-vis plots of dye adsorption using as-synthesized HKUST-1 with (a) RhB and (b) MB dyes.

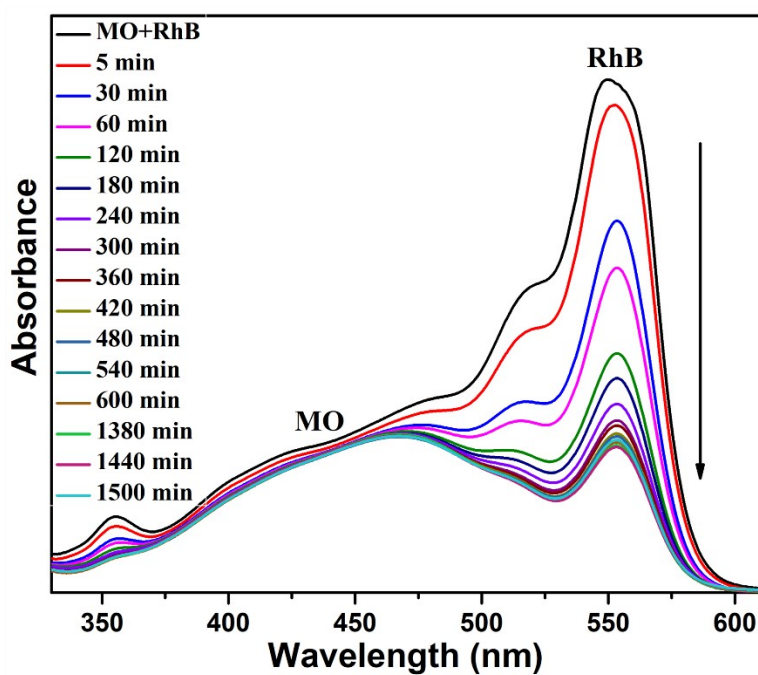

**Fig. S11** UV-vis plots of selective dye adsorption from a mixture of MO/RhB by **HKUST-1@LP** xerogel.

## Comparative dye adsorption data of HKUST-1-based MOFs/MOF composites

**Table S3:** Comparative dye adsorption data of HKUST-1-based MOFs/MOF composites

| MOFs/MOF composites                                                | Adsorbates | Amount of dye Adsorbed ( $q_e$ , mg/g) | References                                                    |
|--------------------------------------------------------------------|------------|----------------------------------------|---------------------------------------------------------------|
| Cu-BTC <sup>a</sup>                                                | MB         | 200                                    | <i>Microporous Mesoporous Mater.</i> , 2014, <b>193</b> , 27. |
| Cu-btc-1 <sup>b</sup>                                              | MB         | 98.83                                  | <i>Inorganica Chim. Acta</i> , 2020, <b>511</b> , 119787.     |
| NDA88-Cu                                                           | MO         | 398.8                                  | <i>J. Clean. Prod.</i> , 2018, <b>184</b> , 949e958.          |
| Cu-BTC <sup>c</sup>                                                | MB         | 45                                     | <i>ACS Omega</i> , 2021, <b>6</b> , 33961.                    |
| HKUST-AMP-SO <sub>3</sub> H                                        | MB         | 833.33                                 | <i>RSC Adv.</i> , 2020, <b>10</b> , 9369.                     |
| HKUST-1 <sup>d</sup>                                               | MB         | 238.09                                 | <i>RSC Adv.</i> , 2020, <b>10</b> , 9369.                     |
| Fe <sub>3</sub> O <sub>4</sub> /Cu <sub>3</sub> (BTC) <sub>2</sub> | MB         | 244                                    | <i>Sci. Rep.</i> , 2015, <b>5</b> , 1.                        |
| Fe <sub>3</sub> O <sub>4</sub> /HKUST-1                            | MB         | 140                                    | <i>J. Mater. Chem. A</i> , 2014, <b>2</b> , 1795.             |
| Fe <sub>3</sub> O <sub>4</sub> /HKUST-1/GO                         | MB         | 155                                    | <i>J. Mater. Chem. A</i> , 2014, <b>2</b> , 1795.             |
| Cu-doped BTC                                                       | MB         | 197.90                                 | <i>J. Environ. Chem. Eng.</i> , 2020, <b>8</b> , 104247.      |

**Synthetic conditions:** <sup>a</sup>Cu-BTC: Hydrothermal method at 100 °C for 10 hours; <sup>b</sup>Cu-btc-1: Hydrothermal method at 120 °C for 48 hours; <sup>c</sup>Cu-BTC: Synthesized at room temperature; <sup>d</sup>HKUST-1: Hydrothermal method at 120 °C for 12 hours.

## Gel-column chromatographic dye separation

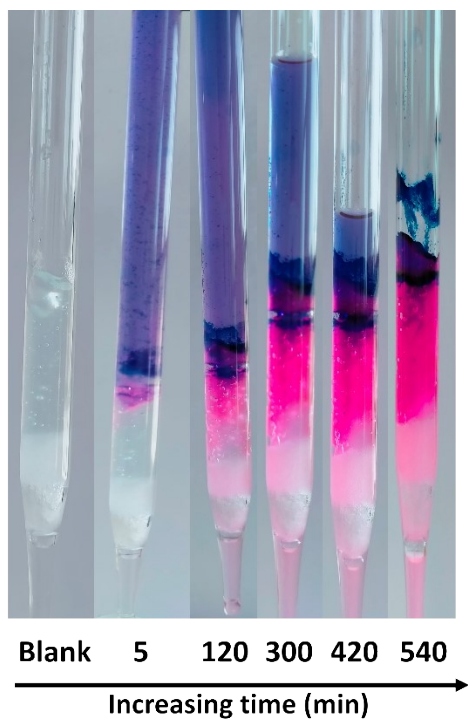

**Fig. S12** Change in the colour of gel-column with time indicating separation of MB and RhB from their mixture using **HKUST-1@LP** hydrogel.

## AFM Images of HKUST-1@LP hydrogel thin film

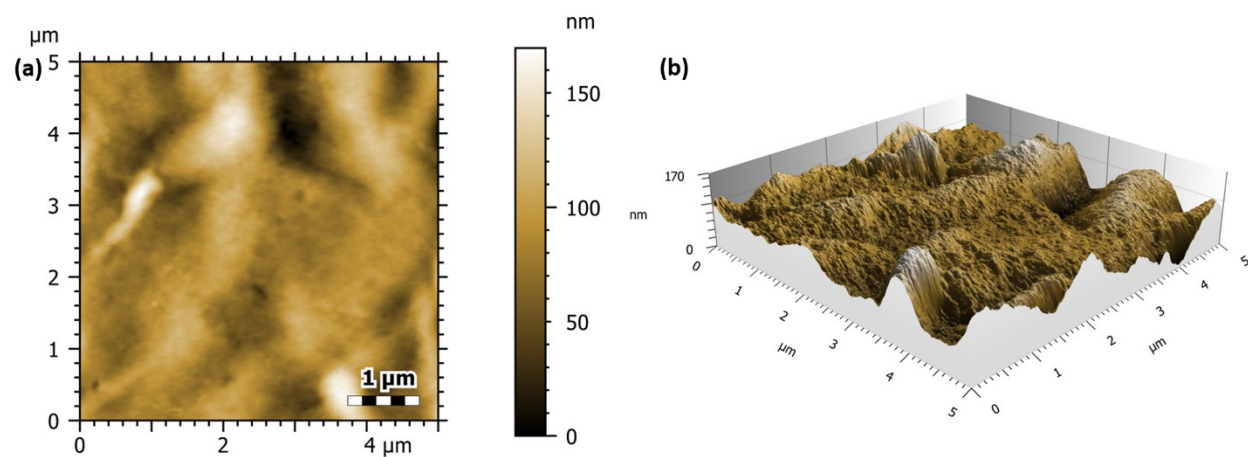

**Fig. S13** AFM Images of **HKUST-1@LP** hydrogel thin film (a) 2D height topography and (b) 3D surface roughness profile.

## Adsorption Kinetics

The pseudo-second-order rate equation<sup>1</sup>:

$$\frac{t}{q_t} = \frac{1}{k_2 q_e^2} + \frac{t}{q_e}$$

(1)

where,  $q_e$  and  $q_t$  (mg/g) are the adsorption capacities of MB at equilibrium and at time  $t$ , respectively and  $k_2$  (g mg<sup>-1</sup>min<sup>-1</sup>) is the rate constant of pseudo-second-order (**Fig. S14**).

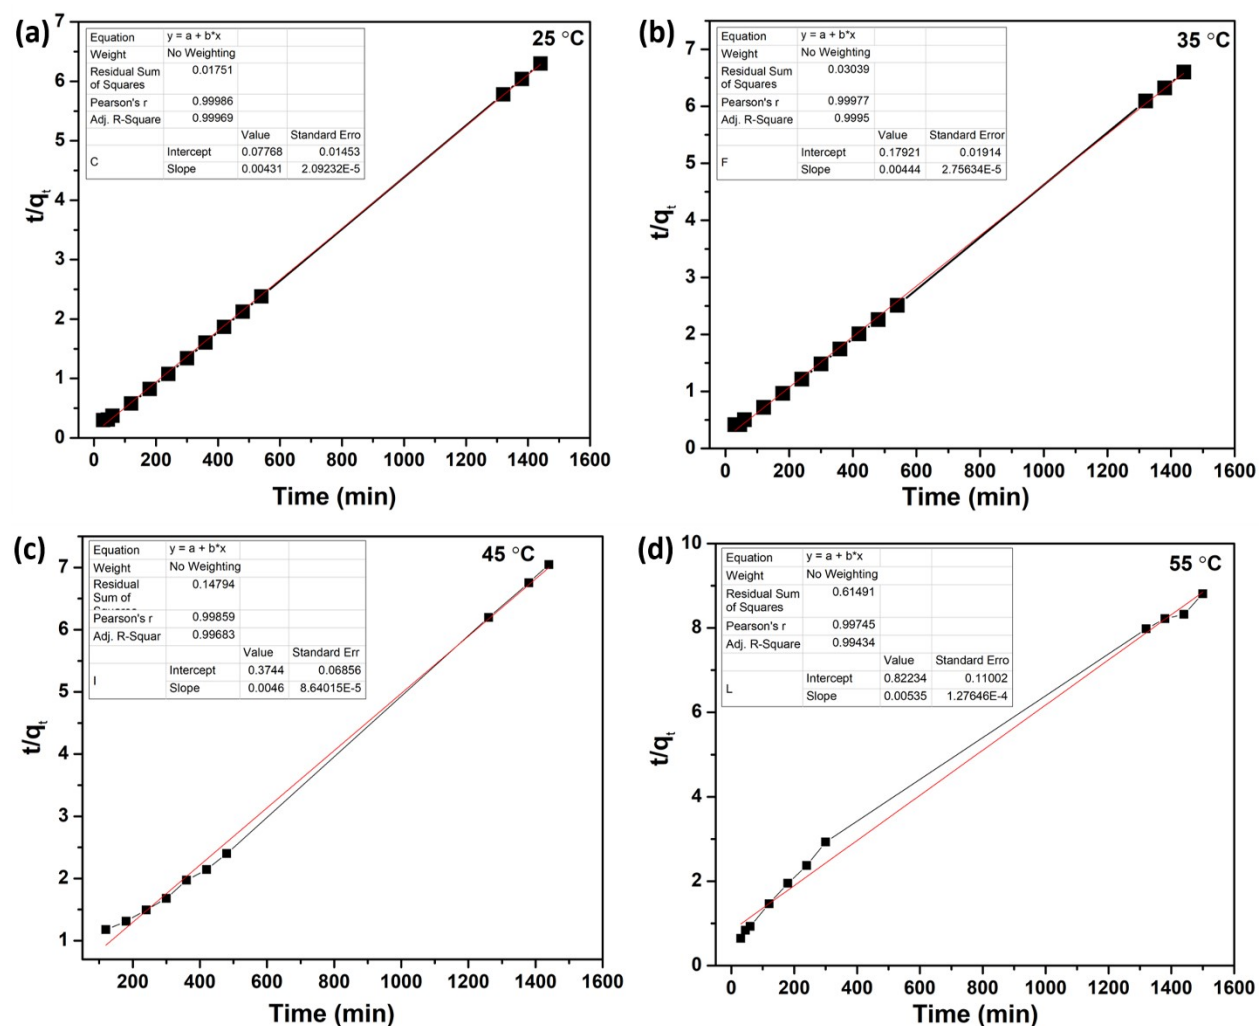

**Fig. S14** The adsorption kinetics of MB by HKUST-1@LP xerogel at different temperatures, representing pseudo-second order kinetics.

The activation energy was also calculated by thermodynamic parameters with the help of  $k_2$  calculated at different temperatures using the Arrhenius equation (2)<sup>2</sup>.

$$\ln k_2 = \ln A - \frac{E_a}{RT} \quad (2)$$

Here, A represents the Arrhenius factor, R is the gas constant, and T denotes the temperature. A linear plot of  $\ln k_2$  versus  $1/T$  for MB adsorption using **HKUST-1@LP** xerogel was constructed to determine the activation energy ( $E_a$ ) from the slope (**Fig. S15**). The calculated  $E_a$  value is  $59.49 \text{ kJ mol}^{-1}$ , with a high linear regression coefficient of 0.99745, indicating an excellent fit.

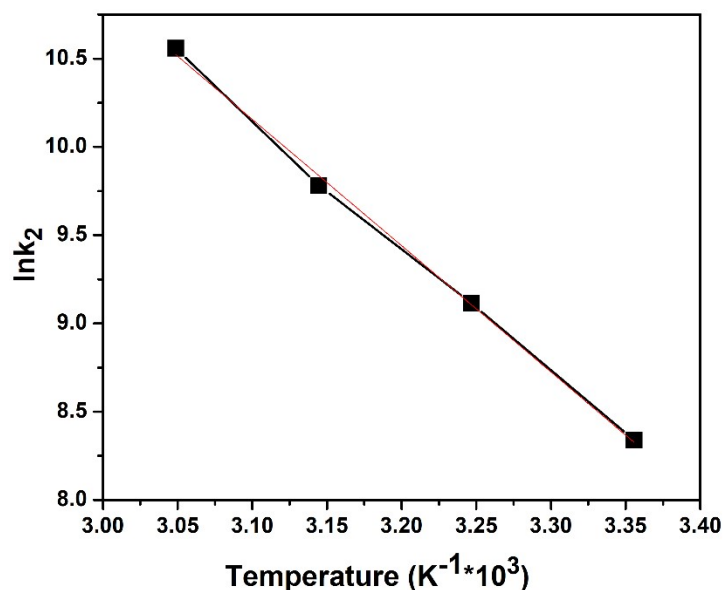

**Fig. S15** Arrhenius plot for adsorption of MB dye.

## References

1. W.-P. Wu, J. Wu, J.-Q. Liu, M. Trivedi and A. Kumar, *RSC Adv.*, 2017, **7**, 54522.  
<https://doi.org/10.1039/c7ra11221a>
2. M. Alkan, Ö. Demirbaş and M. Doğan, *Microporous Mesoporous Mater.*, 2007, **101**, 388.  
<https://doi.org/10.1016/j.micromeso.2006.12.007>
